# Supplementary material for: First Comparative Evaluation of Omadacycline, Tigecycline, and Eravacycline Against Carbapenem-Resistant Acinetobacter baumannii and Klebsiella pneumoniae in Beijing Tertiary Teaching Hospital: An in Vitro Broth Microdilution Study
Source: Research Square preprint supplement (doi:10.21203/rs.3.rs-7052797/v1), 2025-07-15
Supplement: Supplementary file 1 [file d42b05015fbb993eae1b6431.xlsx]

## Sheet: KPN
		KPC	NDM	CAZ(KB)	ERV	TG		替加	奥马	依拉
6		+	-	23			KPC	0.125	2	<=0.0625
K-21	bf	+	-	21	0.75（mic）	4		8	32	4
K-55	ur	+	-	/	/	4		8	>=32	4
K-28	sp	+	-	25	13	4		2	16	2
k-2	sp	+	-	21	15	1		8	16	2
K-93	sp	+	-	24	/	4		4	32	2
K-22	sp	+	-	21	0.75（mic）	4		0.5	4	1
K-75	ur	+	-	24	0.38	2		1	4	1
K-53	sp	+	-	22	/	2		1	16	1
3		+	-	15			IMP、KPC	2	16	1
K-19	sp	+	-	21	16	4		2	16	1
K-20	胸水	+	-	24	15	4		2	16	1
K-29	sp	+	-	24	13	4		2	16	1
K-5	伤口	+	-	22	16	>=8		2	16	1
K-73	ur	+	-	/	/	4		2	16	1
K-74	sp	+	-	21	/	2		2	16	1
K-8	csf	+	-	21	16	4		2	16	1
K-85	sp	+	-	22	0.75（mic）	4		2	16	1
K-86	腹水	+	-	22	0.75（mic）	4		2	16	1
K-9	sp	+	-	22	1（mic）	4		2	16	1
K-90	sp	+	-	/	/	4		2	16	1
K-92	bl	+	-	22	0.75（mic）	4		2	16	1
K-33	bl	+	-	21	/	4		4	16	1
K-39	sp	+	-	22	/	4		4	16	1
K-40	sp	+	-	22	/	4		4	16	1
K-41	ur	+	-	23	2	4		4	16	1
K-56	bf	+	-	24	15	4		4	16	1
K-66	ur	+	-	23	/	4		4	16	1
K-67	胸水	+	-	24	14	4		4	16	1
K-88	sp	+	-	23	/	4		4	16	1
K-42	ur	+	-	21	13	1		8	16	1
2		+	-	23			KPC	2	32	1
K-81	csf	+	-	22	1（mic）	4		2	32	1
K-82	sp	+	-	23	0.75（mic）	4		2	32	1
K-16	sp	+	-	/	/	4		4	32	1
K-51	sp	+	-	22	14	4		4	32	1
K-59	sp	+	-	22	16	4		4	32	1
K-77	ur	+	-	21	0.75（mic）	4		4	32	1
K-80	sp	+	-	22	0.75（mic）	4		4	32	1
K-89	sp	+	-	17	2	4		4	32	1
K-95	bl	+	-	22	0.75（mic）	4		4	32	1
K-68	ur	-	-	/	/	8		4	32	1
K-4	bl	+	-	/	/	2		0.5	4	0.5
K-3	bl	+	-	21	16	4		1	4	0.5
1		+	-	22			KPC	0.5	8	0.5
K-18	引流液	+	-	25	22	<=0.5		1	8	0.5
K-25	ur	+	-	24	/	4		1	8	0.5
K-36	sp	+	-	24	/	2		1	8	0.5
K-44	sp	-	-	/	0.75（mic）	4		1	8	0.5
K-12	sp	+	-	24	20	4		2	8	0.5
K-45	ur	+	-	21	15	4		2	8	0.5
K-46	bl	+	-	22	13	4		2	8	0.5
K-60	引流液	+	-	21	0.125	4		2	8	0.5
K-62	引流液	+	-	/	/	4		2	8	0.5
K-64	脓液	+	-	23	0.19	<=0.5		2	8	0.5
K-65	引流液	+	-	24	/	<=0.5		2	8	0.5
K-52	csf	+	-	22	0.75（mic）	4		1	16	0.5
K-15	ur	+	-	22	16	4		2	16	0.5
K-72	管头	+	-	23	0.75（mic）	4		2	16	0.5
K-78	引流液	+	-	22	/	4		2	16	0.5
K-84	bf	+	-	23	0.75（mic）	4		2	16	0.5
K-87	拭子	+	-	21	/	2		2	16	0.5
K-32	ur	+	-	26	0.125	<=0.5		1	0.25	0.25
K-57	bl	-	-	20	0.25	4		2	4	0.25
11		+	-	18			KPC	0.25	8	0.25
K-11	bl	+	-	22	19	4		1	8	0.25
K-13	引流液	+	-	/	/	2		1	8	0.25
K-14	ur	+	-	/	/	2		1	8	0.25
K-27	bf	+	-	25	15	4		1	8	0.25
K-31	bl	+	-	23	0.75（mic）	4		1	8	0.25
K-37	引流液	+	-	23	15	4		1	8	0.25
K-47	bl	+	-	/	/	4		1	8	0.25
K-49	sp	+	-	23	/	4		1	8	0.25
K-6	ur	+	-	23	21	4		1	8	0.25
K-34	bf	+	-	24	0.5	4		2	8	0.25
K-76	引流液	-	-	24	1.5	1		2	8	0.25
K-26	ur	+	-	21	/	2		1	16	0.25
K-50	sp	+	-	/	/	4		1	16	0.25
K-83	sp	+	-	21	16	2		1	16	0.25
K-35	sp	+	-	23	0.75（mic）	1		0.5	2	0.125
K-23	sp	+	-	21	/	2		0.5	4	0.125
K-48	sp	+	-	/	/	4		0.5	4	0.125
K-96	sp	+	-	22	0.19	2		0.5	4	0.125
K-30	sp	+	-	26	18	2		1	4	0.125
K-58	ur	+	-	22	1（mic）	2		1	4	0.125
K-94	脓液	+	-	23	/	1		0.5	8	0.125
K-43	bf	+	-	21	/	2		0.25	16	0.125
K-61	bf	+	-	24	0.75（mic）	2		0.5	1	0.064
K-10	sp	+	-	/	/	2		0.5	2	0.064
K-38	bf	+	-	23	0.125	2		0.5	4	0.064
K-54	sp	-	-	27	0.5	1		0.5	8	0.064
K-91	bf	+	-	22	0.75（mic）	4

## Sheet: aba
菌株代号	药敏（微量肉汤）
	替加	奥马	依拉
1	0.5	2	0.125
2	0.5	2	0.125
3	0.5	2	0.064
4	0.5	2	0.125
5	0.5	2	0.125
6	0.5	2	0.064
7	0.5	1	<=0.064
8	0.5	2	0.125
A1	2	2	0.25
A2	1	2	0.125
A3	1	1	0.125
A4	0.5	0.5	0.125
A5	0.125	0.125	0.064
A6	1	1	2
A7	1	1	0.25
A8	0.5	1	0.064
A9	1	2	0.125
A10	0.5	2	0.125
A11	0.5	2	0.125
A12	1	2	0.5
A14	1	2	0.5
A15	2	2	0.125
A16	1	2	0.125
A17	1	1	0.125
A18	0.5	1	0.125
A19	1	1	0.125
A20	0.125	0.5	0.064
A21	0.5	1	0.064
A22	0.125	0.25	0.125
A23	0.125	0.125	0.064
A24	0.5	1	0.064
A25	0.5	1	0.125
A26	1	2	0.125
A27	1	2	0.064
A28	1	2	0.125
A30	1	2	0.125
A31	1	2	0.125
A32	1	2	0.125
A33	1	2	0.064
A34	1	2	0.064
A35	1	2	0.25
A36	1	2	0.25
A37	1	2	0.25
A38	0.5	2	0.125
A39	1	1	0.125
A40	1	1	0.125
A41	1	1	0.125
A42	0.5	0.5	0.125
A43	2	2	0.125
A45	2	4	0.064
A47	1	2	0.064
A48	1	2	0.064
A49	1	2	0.064
A50	1	2	0.064
A51	1	1	0.064
A52	1	2	0.064
A53	1	2	0.25
A54	1	2	0.25
A55	1	1	0.125
A56	0.5	1	0.064
A57	0.5	1	0.064
A58	1	1	0.064
A59	0.5	1	0.064
A60	0.5	1	0.064
A61	1	2	0.125
A62	0.5	1	0.125
A63	1	1	0.125
A64	1	1	0.064
A65	0.25	2	0.064
A66	1	1	0.125
A67	1	2	0.125
A68	0.5	1	0.125
A69	2	2	0.25
A70	0.5	1	0.064
A71	0.5	1	0.064
A72	0.5	1	0.064
A73	0.5	1	0.064
A74	2	4	0.5
A75	0.5	1	0.064
A76	0.5	1	0.064
A77	0.5	1	0.125
A78	0.5	1	0.125
A79	0.5	1	0.125
A80	0.5	1	0.125
A81	0.5	1	0.125
A82	0.5	1	0.125
A83	0.5	0.5	0.125
A84	0.5	1	0.064
A85	0.5	0.5	0.125
A86	1	2	0.064
A87	0.5	1	0.064
A88	1	2	0.125
A89	0.5	1	0.064
A90	0.5	0.5	0.064
A91	1	1	0.125
A92	1	1	0.125
A93	0.5	1	0.25
A94	0.25	0.5	0.064
A95	1	2	0.125
A96	1	2	0.125
A97	1	2	0.125
A98	1	2	0.125
A99	0.5	0.5	0.064
A100	0.25	0.5	0.125
A101	0.5	1	0.125
A102	0.5	1	0.064
A103	0.5	0.5	0.125
A104	0.25	0.5	0.064
A105	0.5	1	0.064
A106	1	2	0.125
A107	1	1	0.125
A108	0.5	1	0.125
A109	0.5	1	0.064
A110	0.5	1	0.064
A111	0.25	0.5	0.064
A112	1	2	0.25
A113	0.25	1	0.125
